# Supplementary material for: Reversible iodine absorption by alkali-TCNQ salts with associated changes in physical properties
Source: Royal Society of Chemistry journal article supplement (doi:10.1039/c2jm16821a), 2012-01-01
Supplement: c2jm16821a.pdf [file c2jm16821a.pdf]

## Supporting Information

### Reversible iodine adsorption by alkali-TCNQ salts with associated changes in physical properties

Akira Funabiki,<sup>a</sup> Tomoyuki Mochida,<sup>\*a</sup> Kazuyuki Takahashi,<sup>a</sup> Hatsumi Mori,<sup>b</sup> Takahiro Sakurai,<sup>c</sup> Hitoshi Ohta,<sup>d</sup> Mikio Uruichi<sup>e</sup>

<sup>a</sup>Department of Chemistry, Graduate School of Science, Kobe University, <sup>b</sup>Institute for Solid State Physics, The University of Tokyo, <sup>c</sup>Center for Supports to Research and Education Activities, Kobe University, <sup>d</sup>Molecular Photoscience Research Center, Kobe University, <sup>e</sup>Institute for Molecular Science

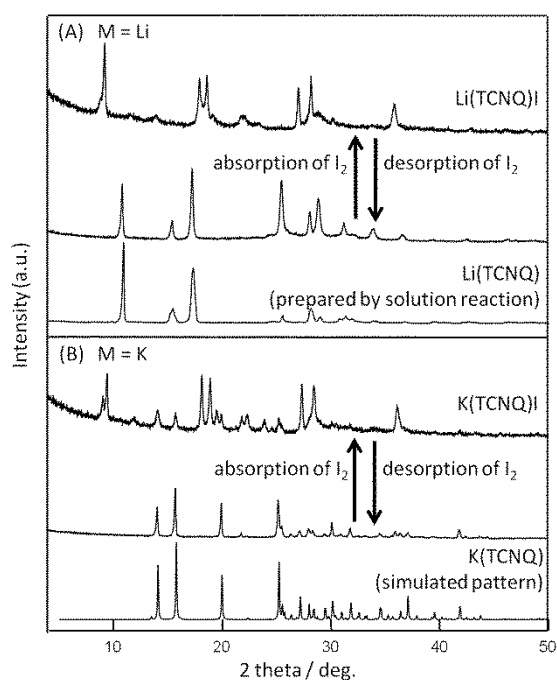

**Fig. S1.** Changes of the powder XRD patterns of M(TCNQ) caused by reversible iodine adsorption for the salts: (A) Li and (B) K.

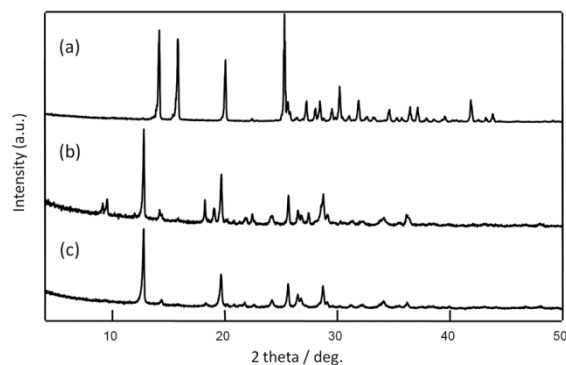

**Fig. S2.** Powder XRD patterns of (a) K(TCNQ) prepared by solution reactions, (b) an over-doped salt obtained by storing K(TCNQ) in an iodine atmosphere for one month, which contains a small portion of K(TCNQ)I, and (c) the over-doped salt obtained by stirring a dispersion of K(TCNQ) in a hexane solution of iodine for two days.

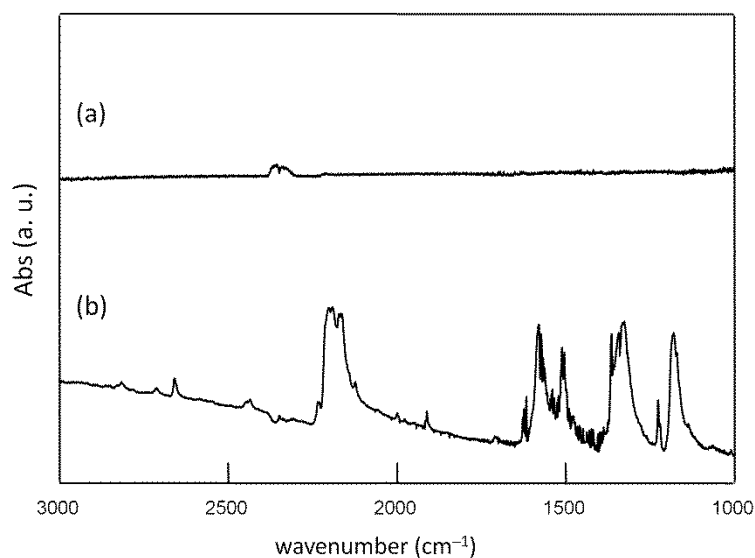

**Fig. S3.** IR spectra of (a) Na(TCNQ)I prepared by solid-state reactions and (b) Na(TCNQ) obtained by annealing Na(TCNQ)I.

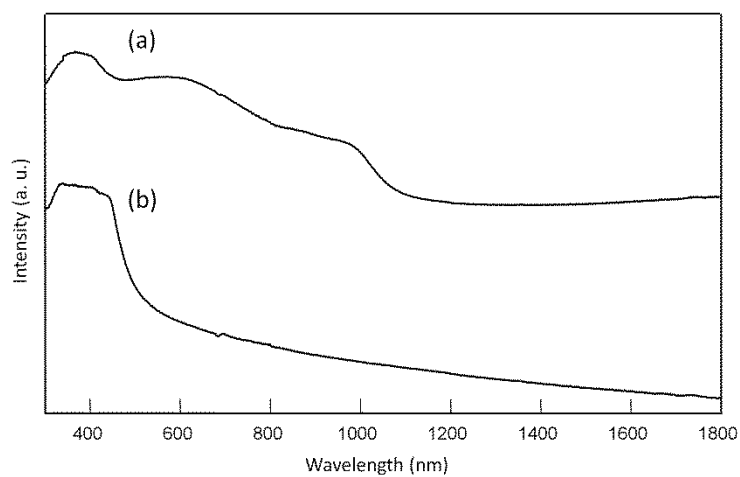

**Fig. S4.** Solid-state UV-vis-NIR absorption spectra of (a)  $\text{Rb}_2(\text{TCNQ})_3\text{I}_2$  prepared by solid-state reaction and (b) TCNQ.

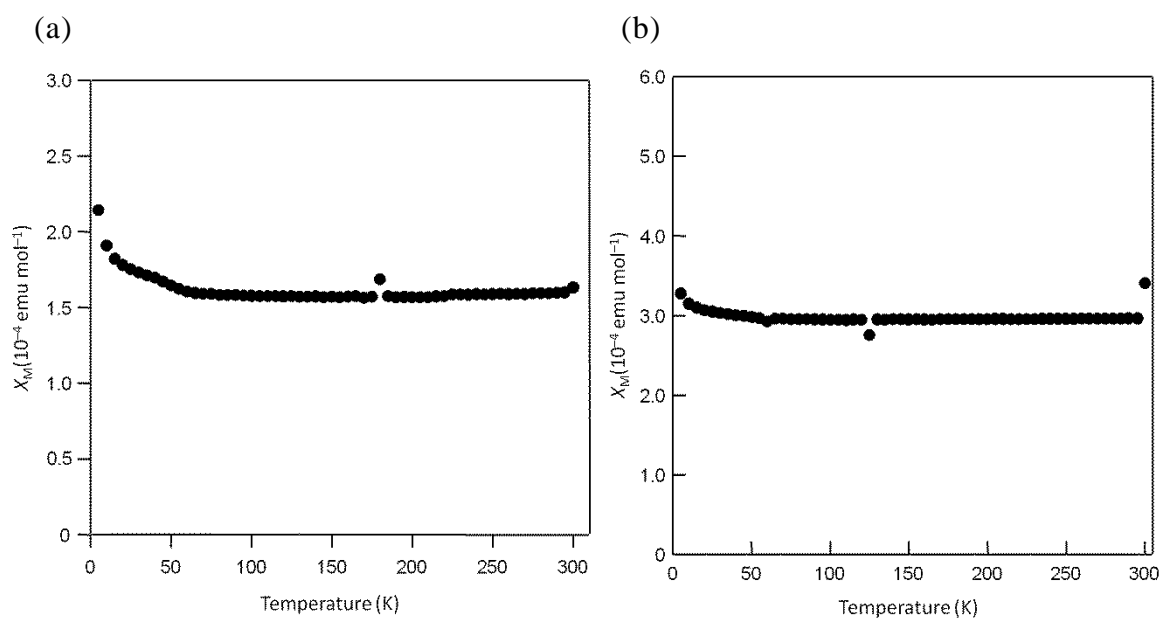

**Fig. S5.** Temperature dependence of the magnetic susceptibilities of (a)  $\text{Na}(\text{TCNQ})\text{I}_{6.0}$  and (b)  $\text{K}(\text{TCNQ})\text{I}_{5.8}$  prepared by liquid phase reactions.

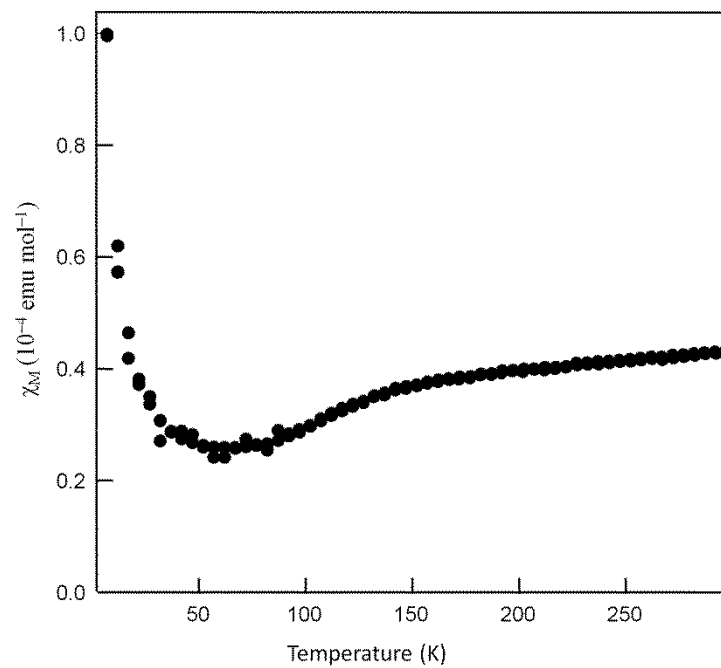

**Fig. S6.** Temperature dependence of the magnetic susceptibility of  $\text{Rb}_2(\text{TCNQ})_3\text{I}_2$  prepared by solid-state reaction.
